# Supplementary material
Source: ML conference proceedings conference paper supplement (https://proceedings.mlr.press/v80/goel18a.html)
Supplement: Supplementary file [file goel18a-supp.pdf]

---

# Learning One Convolutional Layer with Overlapping Patches

---

Surbhi Goel<sup>1</sup> Adam Klivans<sup>1</sup> Raghu Meka<sup>2</sup>

## 1. Omitted Proofs

### 1.1. Proof of Lemma 1

We will follow the following notation:

$$\begin{aligned} T_1 &= \mathbb{E}_{x \sim \mathcal{D}_X} [\sigma(a^T x)(b^T x)] \\ T_2 &= \mathbb{E}_{x \sim \mathcal{D}_X} [(\sigma(a^T x)(b^T x))]. \end{aligned}$$

Since  $x$  is drawn from a symmetric distribution we have  $E_{x \sim \mathcal{D}_X}[F(x)] = E_{x \sim \mathcal{D}_X}[F(-x)]$  for any function  $F$ . Thus, we have

$$\begin{aligned} T_1 &= \mathbb{E}_{x \sim \mathcal{D}_X} [\sigma(-a^T x)(-b^T x)] \\ \implies 2T_1 &= \mathbb{E}_{x \sim \mathcal{D}_X} [(\sigma(-a^T x) - \sigma(a^T x))(b^T x)] \end{aligned}$$

Observe that  $\sigma(c) - \sigma(-c) = \frac{(1-\alpha)|c| + (1+\alpha)c}{2} - \frac{(1-\alpha)|-c| - (1+\alpha)c}{2} = (1+\alpha)c$ . Substituting this in the above, we get the required result  $2T_1 = (1+\alpha)T_2$ .

### 1.2. Proof of Lemma 2

We have,

$$\begin{aligned} & \frac{1}{k} \sum_{1 \leq i \leq k} \mathbb{E}_x [(\sigma(w_* P_i x) - \sigma(w P_i x))(w_* - w)^T P_i x] \\ &= \frac{1+\alpha}{2k} \sum_{1 \leq i \leq k} \mathbb{E}_x [((w_* - w)^T P_i x)^2] \\ &= \frac{1+\alpha}{2k} (w_* - w_t)^T \left( \sum_{1 \leq i \leq k} P_i \mathbb{E}_x [x x^T] P_i^T \right) (w_* - w_t) \\ &= \frac{1+\alpha}{2k} (w_* - w_t)^T \left( \sum_{1 \leq i \leq k} P_i \Sigma P_i^T \right) (w_* - w_t) \\ &\leq \frac{1+\alpha}{2k} \lambda_{\max}(\Sigma) \left( \sum_{1 \leq i \leq k} \lambda_{\max}(P_i P_i^T) \right) \|w_* - w_t\|^2 \\ &= \frac{1+\alpha}{2} \lambda_{\max}(\Sigma) \|w_* - w\|^2 \end{aligned}$$

---

<sup>\*</sup>Equal contribution <sup>1</sup>Department of Computer Science, University of Texas at Austin <sup>2</sup>Department of Computer Science, UCLA. Correspondence to: Surbhi Goel <surbhi@cs.utexas.edu>.

The first equality follows from using Lemma 1 and the last follows since for all  $i$ ,  $P_i P_i^T$  is a permutation of the identity matrix by definition.

Using monotonicity of  $\sigma$  and Jensen's inequality, we also have,

$$\begin{aligned} & \frac{1}{k} \sum_{1 \leq i \leq k} \mathbb{E}_x [(\sigma(w_* P_i x) - \sigma(w P_i x))(w_* - w)^T P_i x] \\ &\geq \frac{1}{k} \sum_{1 \leq i \leq k} \mathbb{E}_x [(\sigma(w_* P_i x) - \sigma(w P_i x))^2] \\ &\geq \mathbb{E}_x \left[ \left( \frac{1}{k} \sum_{1 \leq i \leq k} (\sigma(w_* P_i x) - \sigma(w P_i x)) \right)^2 \right] \\ &= L(w). \end{aligned}$$

Combining the two above lemmas, we get the required result.

### 1.3. Proof of Lemma 3

We have,

$$\begin{aligned} & (f_{w_*}(x) - f_{w_t}(x))^2 \\ &= \left( \frac{1}{k} \sum_{i=1}^k (\sigma(w_*^T P_i x) - \sigma(w^T P_i x)) \right)^2 \\ &\leq \frac{1}{k} \sum_{i=1}^k (\sigma(w_*^T P_i x) - \sigma(w^T P_i x))^2 \\ &\leq \frac{1}{k} \sum_{i=1}^k (w_*^T P_i x - w^T P_i x)^2 \\ &\leq \frac{1}{k} \sum_{i=1}^k \|w_* - w\|^2 \lambda_{\max}(P_i P_i^T) \|x\|^2 \\ &\leq \|w_* - w\|^2 \|x\|^2 \end{aligned}$$

The first inequality follows from using Jensen's, the second inequality follows from the 1-Lipschitz property of  $\sigma$ , the third follows from observing that  $P_i P_i^T$  is a PSD matrix and the last inequality follows since for all  $i$ ,  $\lambda_{\max}(P_i P_i^T) = 1$  since  $P_i P_i^T$  is a permutation of the identity matrix.

## 2. Properties of Patch Matrix $P$

Let  $r = pd + q$  for some  $p \geq 0$  and  $1 \leq q \leq d$ .

**Lemma A.** For  $d < r/3$ ,  $P^{-1}$  has the following form:

$$P_{i,j}^{-1} = \begin{cases} \alpha_0 & \text{if } i = j \in \{1, \dots, q\} \cup \{r - q + 1, \dots, r\} \\ \alpha_1 & \text{if } i = j \in \{q + 1, \dots, d\} \cup \{r - d + 1, r - q\} \\ 1 & \text{if } i = j \in \{d + 1, \dots, r - d\} \\ -0.5 & \text{if } |i - j| = d + 1 \\ \phi & \text{if } |i - j| = (p - 1)d + 1 \text{ and } i \text{ or } j \in \{q + 1, \dots, d\} \\ \beta & \text{if } |i - j| = pd + 1 \\ 0 & \text{otherwise} \end{cases}$$

where  $\alpha_0 = \beta + 0.5$ ,  $\alpha_1 = \phi + 0.5$ ,  $\beta = \frac{0.5}{2k-p}$  and  $\phi = \frac{0.5}{2k-p-1}$ . Also,  $\lambda_{\max}(P^{-1}) \leq 2$ .

*Proof.* We need to show that  $A = PP^{-1} = I$ . Observe that  $P$  and  $P^{-1}$  are bisymmetric, thus  $A$  is centrosymmetric implying  $A_{i,j} = A_{r-1-i, r-1-j}$ . Hence, we need to only prove that the lower triangular matrix matches  $I$ . We show the result for  $p > 2$ , as the same ideas apply for the other case.

To verify this, consider each diagonal entry,

- $d \leq i \leq \lceil d/2 \rceil$ :  $A_{i,i} = -0.5(k-1) + k - 0.5(k-1) = 1$ .
- $i \in \{1, \dots, q\}$ :  $A_{i,i} = \alpha_0 k - 0.5(k-1) + \beta(k-p) = 1$ .
- $i \in \{q+1, \dots, d\}$ :  $A_{i,i} = \alpha_1 k - 0.5(k-1) + \phi(k-p-1) = 1$ .

For non-diagonal entries, that is,  $j \neq i$ ,

- $d \leq j \leq \lceil d/2 \rceil$ :  $A_{i,j} = -0.5P_{i,j-d} + P_{i,j} - 0.5P_{i,j+d}$ . If  $|i-j| = ad$  then  $A_{i,j} = -0.5(k-a-1) + k - a - 0.5(k-a+1) = 0$ , else  $P_{i,j} = P_{i,j-d} = P_{i,j+d} = 0 \implies A_{i,j} = 0$ .
- $j \in \{1, \dots, q\}$ :  $A_{i,j} = \alpha_0 P_{i,j} - 0.5P_{i,j+d} + \beta P_{i,j+pd}$ . Now if  $i-j = ad$ , then  $A_{i,j} = \alpha_0(k-a) - 0.5(k-a+1) + \beta(k-p+a) = 0$  else  $P_{i,j} = P_{i,j+d} = P_{i,j+pd} = 0 \implies A_{i,j} = 0$ .
- $j \in \{q+1, \dots, d\}$ :  $A_{i,j} = \alpha_1 P_{i,j} - 0.5P_{i,j+d} + \beta P_{i,j+pd}$ . Now if  $i-j = ad$ , then  $A_{i,j} = \alpha_1(k-a) - 0.5(k-a+1) + \phi(k-p+a+1) = 0$  else  $P_{i,j} = P_{i,j+d} = P_{i,j+pd} = 0 \implies A_{i,j} = 0$ .

Hence  $A = I$ .

Using Theorem 1, we have  $\lambda_{\max}(P^{-1}) = \max_i \left( P_{i,i}^{-1} + \sum_{j \neq i} |P_{i,j}^{-1}| \right)$ . If  $q < d$ , then  $\lambda_{\max}(P^{-1}) =$

Figure 1.  $P^{-1}$  for  $d = 1$ . Here  $\alpha = \beta + 0.5$  and  $\beta = \frac{0.5}{2k-p} = \frac{0.5}{2n-3r+3}$ . The shaded area is all 0s.

$\max(\alpha_0 + 0.5 + \beta, \alpha_1 + 0.5 + \phi, 1 + 0.5 + 0.5) = \max(2\beta + 1, 2\phi + 1, 2) = 2$  as  $\beta, \phi \leq 0.5$  which follows from  $2k - p - 1 \geq 1$ . Similarly, when  $q = d$ ,  $\lambda_{\max}(P^{-1}) = \max(\alpha_0 + 0.5 + \beta, 1 + 0.5 + 0.5) = \max(2\beta + 1, 2) = 2$ .  $\square$

**Lemma B.** For  $r/3 \leq d < r/2$ ,  $P^{-1}$  has the following form:

$$P_{i,j}^{-1} = \begin{cases} \alpha_0 & \text{if } i = j \in \{1, \dots, q\} \cup \{r - q + 1, \dots, r\} \\ \alpha_1 & \text{if } i = j \in \{q + 1, \dots, d\} \cup \{r - d + 1, r - q\} \\ 1 & \text{if } i = j \in \{d + 1, \dots, r - d\} \\ -0.5 & \text{if } |i - j| = d + 1 \text{ and } i \text{ or } j \in \{d + 1, \dots, r - d\} \\ \phi & \text{if } |i - j| = d + 1 \text{ and } i \text{ or } j \in \{q + 1, \dots, d\} \\ \beta & \text{if } |i - j| = 2d + 1 \\ 0 & \text{otherwise} \end{cases}$$

where  $\alpha_0 = \beta + 0.5$ ,  $\alpha_1 = \frac{k}{2k-1}$ ,  $\beta = \frac{0.5}{2k-2}$  and  $\phi = -\frac{k-1}{2k-1}$ . Also,  $\lambda_{\max}(P^{-1}) \leq 2$ .

*Proof.* Similar to the previous lemma, to verify this, consider each diagonal entry,

- $d \leq i \leq \lceil d/2 \rceil$ :  $A_{i,i} = -0.5(k-1) + k - 0.5(k-1) = 1$ .
- $i \in \{1, \dots, q\}$ :  $A_{i,i} = \alpha_0 k - 0.5(k-1) + \beta(k-p) = 1$ .
- $i \in \{q+1, \dots, d\}$ :  $A_{i,i} = \alpha_1 k + \phi(k-1) = 1$ .

For non-diagonal entries, that is,  $j \neq i$ ,

- $d \leq j \leq \lceil d/2 \rceil$ :  $A_{i,j} = -0.5P_{i,j-d} + P_{i,j} - 0.5P_{i,j+d}$ . If  $|i-j| = ad$  then  $A_{i,j} = -0.5(k-a-1) + k - a - 0.5(k-a+1) = 0$ , else  $P_{i,j} = P_{i,j-d} = P_{i,j+d} = 0 \implies A_{i,j} = 0$ .

- $j \in \{1, \dots, q\}$ :  $A_{i,j} = \alpha_0 P_{i,j} - 0.5 P_{i,j+d} + \beta P_{i,j+2d}$ .  
Now if  $i - j = ad$ , then  $A_{i,j} = \alpha_0(k - a) - 0.5(k - a + 1) + \beta(k - 2 + a) = 0$  else  $P_{i,j} = P_{i,j+d} = P_{i,j+2d} = 0 \implies A_{i,j} = 0$ .
- $j \in \{q + 1, \dots, d\}$ :  $A_{i,j} = \alpha_1 P_{i,j} + \phi P_{i,j+d}$ . Now if  $i - j = ad$ , then  $a = 1$ , implying  $A_{i,j} = \alpha_1(k - 1) + \phi k = 0$  else  $P_{i,j} = P_{i,j+d} = 0 \implies A_{i,j} = 0$ .

Hence  $A = I$ .

Similar to the previous lemma, we have  $\lambda_{\max}(P^{-1}) = \max(\alpha_0 + 0.5 + \beta, \alpha_1 + |\phi|, 1 + 0.5 + 0.5) = \max(2\beta + 1, 1, 2) = 2$  as  $\alpha_1 + |\phi| = 1$  and  $\beta \leq 0.5$  which follows from  $2k - p - 1 \geq 1$ .  $\square$
